of tourniquet-induced analgesia, the search for a more reliable and effective agents should continue.

LAXMAIAH MANCHIKANTI, M.D.  
*Director of Pain Management Center  
Attending Anesthesiologist  
Pain Management Center of Paducah  
Department of Anesthesiology  
Lourdes Hospital  
Paducah, Kentucky 42003*

Anesthesiology  
73:586, 1990

*In Reply:*—We welcome the opportunity to again respond to Dr. Manchikanti. As we have stated previously, as no controlled clinical trials have proven the benefit of intravenous regional bretylium (IRB) in reflex sympathetic dystrophy (RSD), the issue remains controversial.<sup>1</sup> We have clinical experience and basic science evidence for the effectiveness of bretylium in producing temporary sympathetic blockade. We have demonstrated by thermography the presence of sympathetic blockade 36 h after IRB. As pointed out by Dr. Manchikanti and others (Hanowell,<sup>2</sup> Ramamurthy<sup>3</sup>), there may be large variability in the response to sympatholytic techniques in individual patients, and one technique may be more efficacious at sympathetic blockade than another in a given patient. We have found this true in our practice.

However, the broader issue is the effectiveness of this blockade for the treatment of RSD. Clearly, sympathetic blockade is not a curative therapy for RSD and may be beneficial only to the extent that it allows for more active physical therapy. It does not surprise us, therefore, that the four patients in Dr. Manchikanti's study who did not obtain relief with stellate or lumbar sympathetic block may also not respond to IRB.

The problem is not the lack of an "effective" sympatholytic agent, but rather the lack of an understanding of the pathophysiology of this symptom complex. Until this basic knowledge is available, we must continue to emphasize the multidisciplinary, multimodality approach to the therapy for RSD.

Anesthesiology  
73:586–587, 1990

## Doppler-guided Axillary Block in a Burn Patient

*To the Editor:*—Axillary nerve blocks can be difficult to perform if one cannot palpate the axillary artery pulsations to locate the axillary sheath. A 58-yr-old woman with a burn to the dorsum of her left hand came to the operating room for a tangential escharotomy and placement of a split-thickness skin graft. Her past medical history included longstanding rheumatoid arthritis, hypertension, stable angina, and congestive heart failure.

Multiple observers were unable to palpate the axillary artery due to the large size of her arm and her significant vascular disease. With the use of a Doppler Flowmeter (Parks Medical Electronics Inc.) probe, the axillary artery was easily located. A 22-G × 2-inch short beveled needle was advanced parallel to the Doppler probe, and a paresthesia was obtained. The local anesthetic was injected and a successful block occurred. A field block was used for the donor site on the right thigh.

## REFERENCES

1. Ford SR, Forrest WH, Eletherington L: The treatment of reflex sympathetic dystrophy with intravenous regional bretylium. *ANESTHESIOLOGY* 68:137–140, 1988
2. Hanowell LH, Kanefield JK, Soriano SG: A recommendation for reduced lidocaine dosage during intravenous regional bretylium treatment of reflex sympathetic dystrophy. *ANESTHESIOLOGY* 71:811–812, 1989

(Accepted for publication June 25, 1990.)

ROBERT V. JOHNSTON, JR., M.D.  
*Director, Pain Service*

STEVEN R. FORD, M.D.  
*Department of Anesthesiology*

*Department of Anesthesiology  
University of Texas Medical Branch  
Galveston, Texas*

## REFERENCES

1. Ford SR, Johnston RV: Intravenous guanethidine and reserpine in reflex sympathetic dystrophy (letter to the editor). *Pain*, in press.
2. Hanowell LH, Kanefield JK, Soriano SG: A recommendation for reduced lidocaine dosage during intravenous regional bretylium treatment of reflex sympathetic dystrophy. *ANESTHESIOLOGY* 71:811–812, 1989
3. Ramamurthy S, Hoffman J, Walsh N, Schoenfield L: Role of tourniquet-induced analgesia in iv regional sympatholysis (abstract). *ANESTHESIOLOGY* 65:A207, 1986

(Accepted for publication June 25, 1990.)

To our knowledge, there has been only one prior report<sup>1</sup> of the use of a hand-held Doppler probe to assist in locating the axillary artery for a difficult axillary block. This technique has also been used for difficult intercostal<sup>2</sup> and supraclavicular brachial plexus<sup>3</sup> nerve blocks. It should be considered for any difficult nerve block where vascular landmarks are used but are not readily found.

ALAN D. KESTENBAUM, M.D.  
*Attending Anesthesiologist  
Department of Anesthesiology*

MICHAEL STEUER, M.D.  
*Resident in Anesthesiology  
Department of Anesthesiology*

MICHAEL MARANO, M.D.  
*Attending Surgeon*  
*Department of Surgery*

*The New York Hospital-Cornell Medical Center*  
*525 East 68th Street*  
*New York, New York 10021*

Anesthesiology  
73:587, 1990

## Local Anesthetics and Post-Dural Puncture Headaches

*To the Editor:*—I read with great interest the study by Naulty *et al.* on the relationship of local anesthetic used and post-dural puncture headaches ("PDPH").<sup>1</sup> This paper adds yet another "twist" to the somewhat confusing list of factors that may, or may not, affect the incidence of PDPHs. There are, however, some questions that need to be addressed before the "two-phase" PDPH hypothesis these authors suggest can be considered.

If low concentrations of lidocaine or bupivacaine in the cerebrospinal fluid (CSF) cause vasoconstriction followed by reactive hyperemia of intracranial blood vessels with resulting headache, as postulated, then a certain percentage of patients who receive epidural anesthesia should develop a PDPH. Significant concentrations of local anesthetic deposited into the epidural space can be measured in the CSF.<sup>2</sup> Therefore, by the same mechanism, epidurally administered local anesthetics (lidocaine and bupivacaine) should cause an "immediate" phase headache. To my knowledge, this does not occur. It seems more likely, of the explanations offered by Naulty *et al.*, that the role of glucose may be more important than the local anesthetic. This is supported by the fact that local anesthetic solutions for epidural use do not contain glucose.

Moreover, if the local anesthetic is playing an important role, we might expect a difference in the onset and quality of PDPHs after diagnostic lumbar puncture and those after subarachnoid block. Since local anesthetic is not injected after a diagnostic puncture, the headache that develops in these patients should occur later (>36 h) when compared to patients receiving a subarachnoid block with lidocaine or bupivacaine. I would be interested to know if this is the case.

Anesthesiology  
73:587-588, 1990

*In Reply:*—The author of this letter has raised some interesting and thoughtful questions, revolving around three issues:

*Headaches following epidural anesthesia.* Several studies<sup>1,2</sup> have described the incidence of headache after uncomplicated epidural anesthesia for parturition to range from 10-30%, usually with a duration of less than 24 h. In the month since we received this letter, we have carefully assessed all of our patients who underwent uncomplicated (*i.e.*, no dural puncture) epidural anesthesia for vaginal (0.0625-0.125% bupivacaine) and cesarean delivery (2% lidocaine with 1/200,000 epinephrine) for postpartum headache. Interestingly, significantly more ( $P = 0.003$ , chi-squared) patients who had epidural anesthesia with the

## REFERENCES

1. Abramowitz H, Cohen C: Use of Doppler for difficult axillary block. *ANESTHESIOLOGY* 55:603, 1981
2. Vaghadia H, Jenkins L: Use of a Doppler ultrasound stethoscope for intercostal nerve block. *Can J Anaesthesia* 35:86-89, 1988
3. La Grange P, Foster P, Pretorius L: Application of the Doppler ultrasound bloodflow detector in supraclavicular brachial plexus block. *Br J Anaesth* 50:965-967, 1978

(Accepted for publication June 25, 1990.)

Finally, if this "first-phase" headache were due to local anesthetic and not CSF leakage, then prophylactic epidural blood patches should rarely be effective. Though controversial, there are many reports on the efficacy of prophylactic blood patches.<sup>3</sup> Those that object to their use do so not because they are ineffective, but for other reasons.<sup>4</sup>

ROBERT D. CULLING, D.O.  
*Department of Anesthesiology*  
*Lovelace Medical Center*  
*5400 Gibson Blvd., S.E.*  
*Albuquerque, New Mexico 87108*

## REFERENCES

1. Naulty JS, Hertwig L, Hurt CO, Datta S, Ostheimer GW, Weiss JD: Influence of local anesthetic solutions on postdural puncture headache. *ANESTHESIOLOGY* 72:450-454, 1990
2. Bromage PR: *Epidural Analgesia*. Philadelphia, W.D. Saunders, 1978, pp 121-128
3. Quaynon H., Corbey M: Extradural blood patch—Why delay? *Br J Anaesth* 57:538-540, 1985
4. Crawford JS: Experiences with epidural blood patch. *Anaesthesia* 35:513-515, 1980

(Accepted for publication June 26, 1990.)

high concentrations of lidocaine for cesarean delivery reported headaches (34%) than patients receiving dilute bupivacaine for vaginal delivery (16%). All of these headaches resolved within 36 h. We plan to continue this study to determine the true incidence of headache after uncomplicated epidural anesthesia with various epidural anesthetic drugs, and we thank the authors for their suggestion. We feel that the role of the drug used for spinal anesthesia in the production of this "immediate-phase" headache remains unclear at the present time.

*The time course of headache after diagnostic lumbar puncture.* It is impossible to determine from the literature what the time course for headache after diagnostic lumbar puncture would be if performed
